# Supplementary material for: Crystal structure of human endothelin ETB receptor in complex with peptide inverse agonist IRL2500
Source: PubMed Central journal article supplement (PMC6588608; doi:10.1038/s42003-019-0482-7), 2019-06-21
Supplement: 42003_2019_482_MOESM1_ESM.pdf [file 42003_2019_482_MOESM1_ESM.pdf]

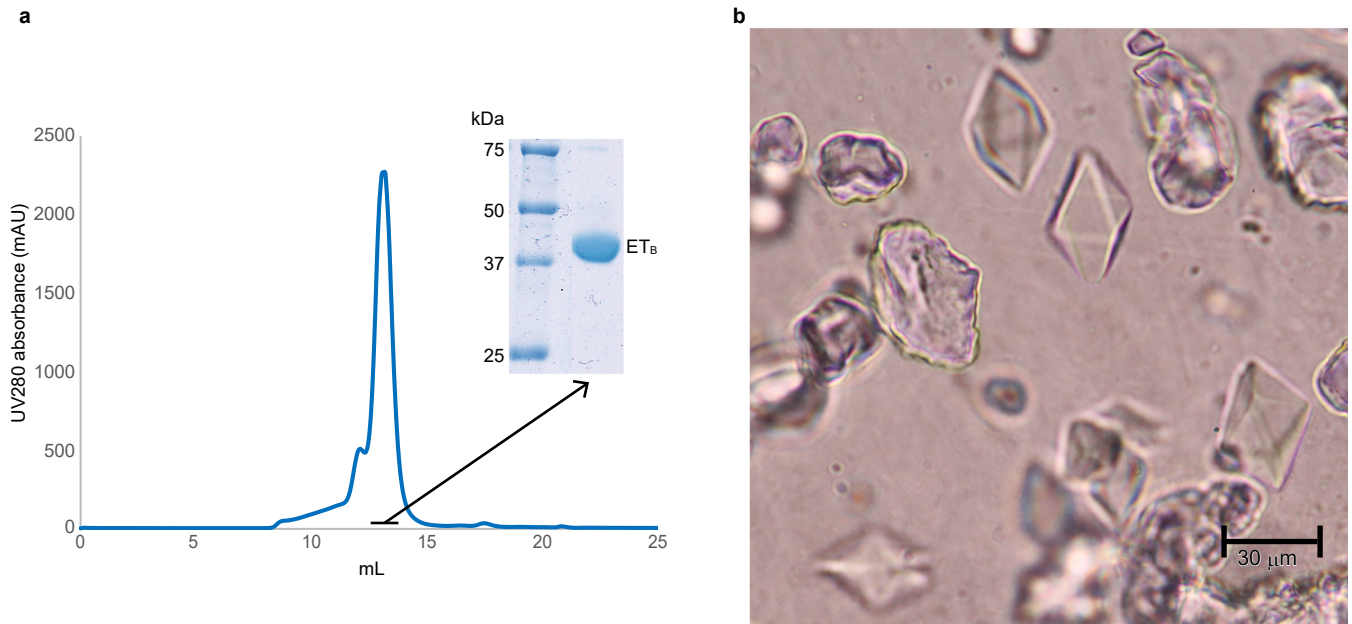

**Supplementary Figure 1 | Crystallization.**

**a**, Gel filtration chromatogram and SDS-PAGE of the purified IRL2500-bound ET<sub>B</sub> receptor. **b**, Crystals of the IRL2500-bound ET<sub>B</sub> receptor.

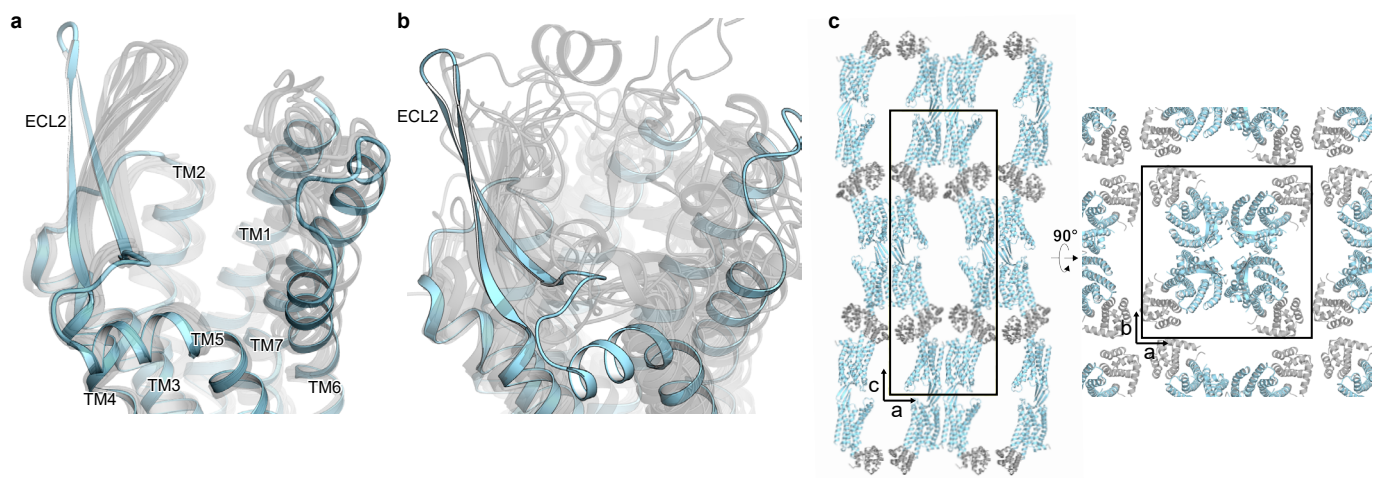

**Supplementary Figure 2 | Comparison of the ECL2 structure with those of other peptide-activated GPCRs.**

**a**, Superimposition of the ET<sub>B</sub> structures determined to date. The IRL2500-bound and other structures are coloured sky blue and gray, respectively. **b**, Superimposition of the IRL2500-bound ET<sub>B</sub> structure with other peptide-activated class A GPCRs. **c**, Crystal packing of the IRL2500-bound ET<sub>B</sub> structure. The receptor and T4L are shown as grey and blue ribbons, respectively. The crystal lattice is indicated by black lines.

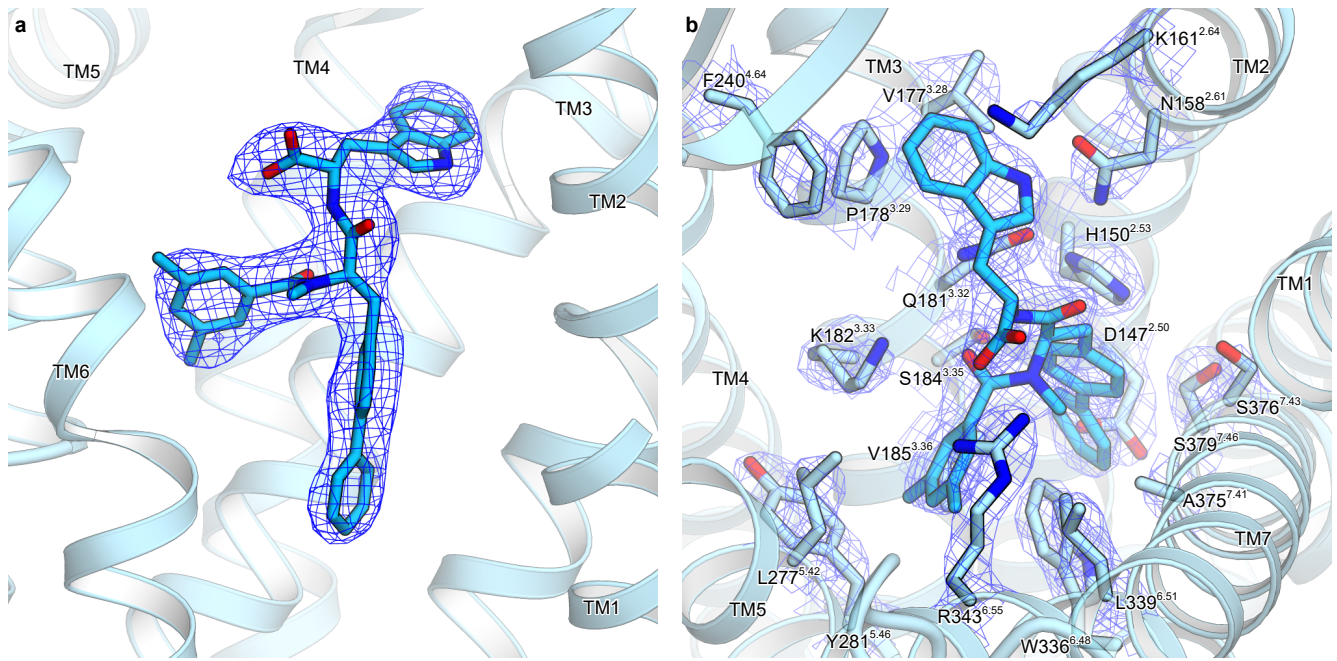

**Supplementary Figure 3 | Electron density.**

**a,**  $F_o - F_c$  omit maps for IRL2500, contoured at  $3.0\sigma$ . **b,**  $2F_o - F_c$  map around the IRL2500 binding site, contoured at  $2.5\sigma$ .

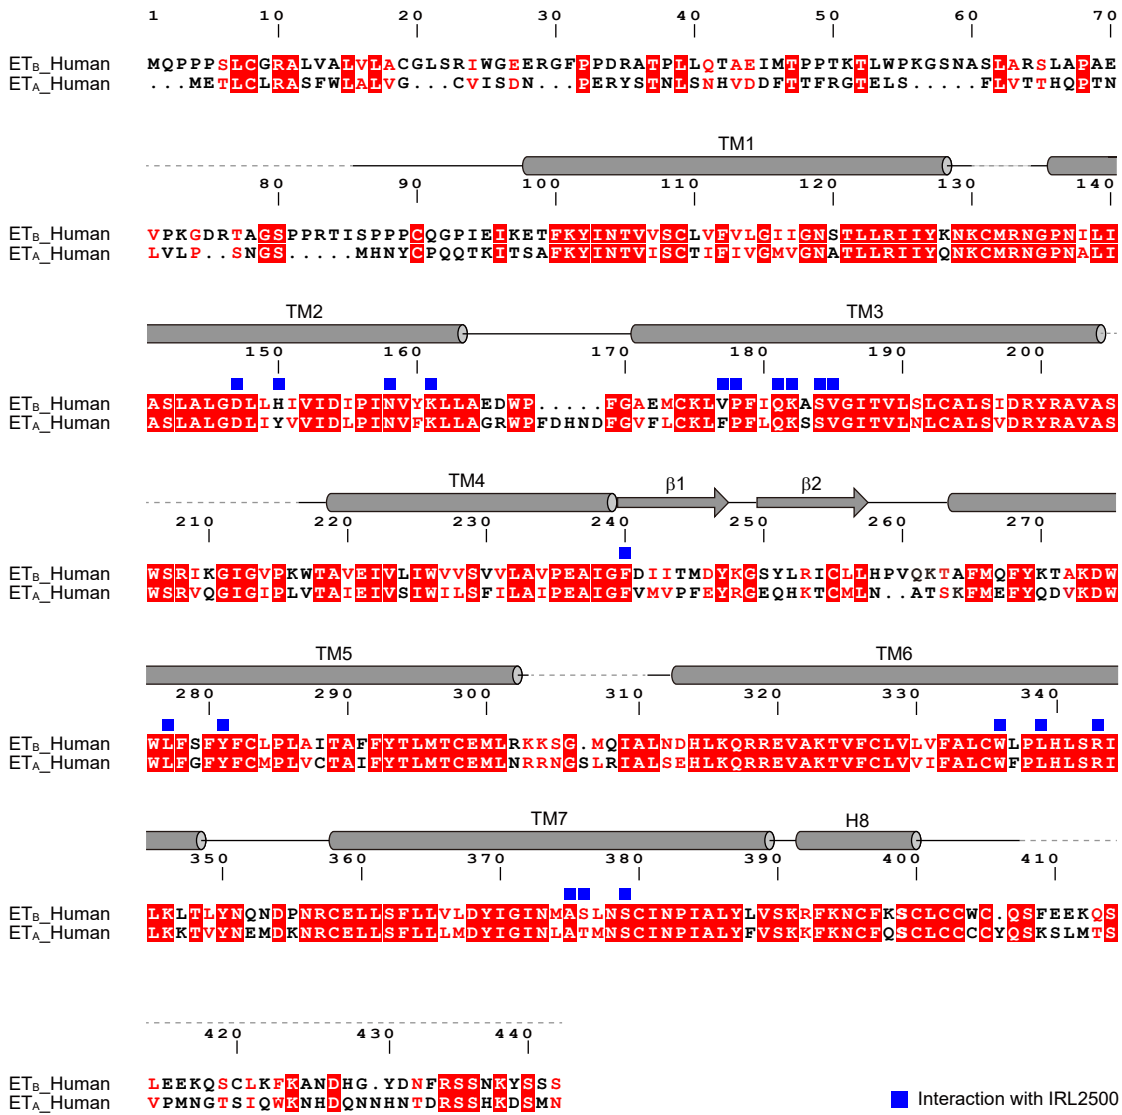

### Supplementary Figure 4 | Alignment of the human ET<sub>A</sub> and ET<sub>B</sub> receptors.

Alignment of the amino acid sequences of the human ET<sub>B</sub> receptor (Uniprot ID: P24530) and the human ET<sub>A</sub> receptor (P25101). Secondary structure elements for  $\alpha$ -helices and  $\beta$ -strands are indicated by cylinders and arrows, respectively. Conservation of the residues between ET<sub>A</sub> and ET<sub>B</sub> is indicated as follows: red panels for completely conserved; red letters for partially conserved; and black letters for not conserved. The residues involved in IRL2500 binding are indicated with squares.

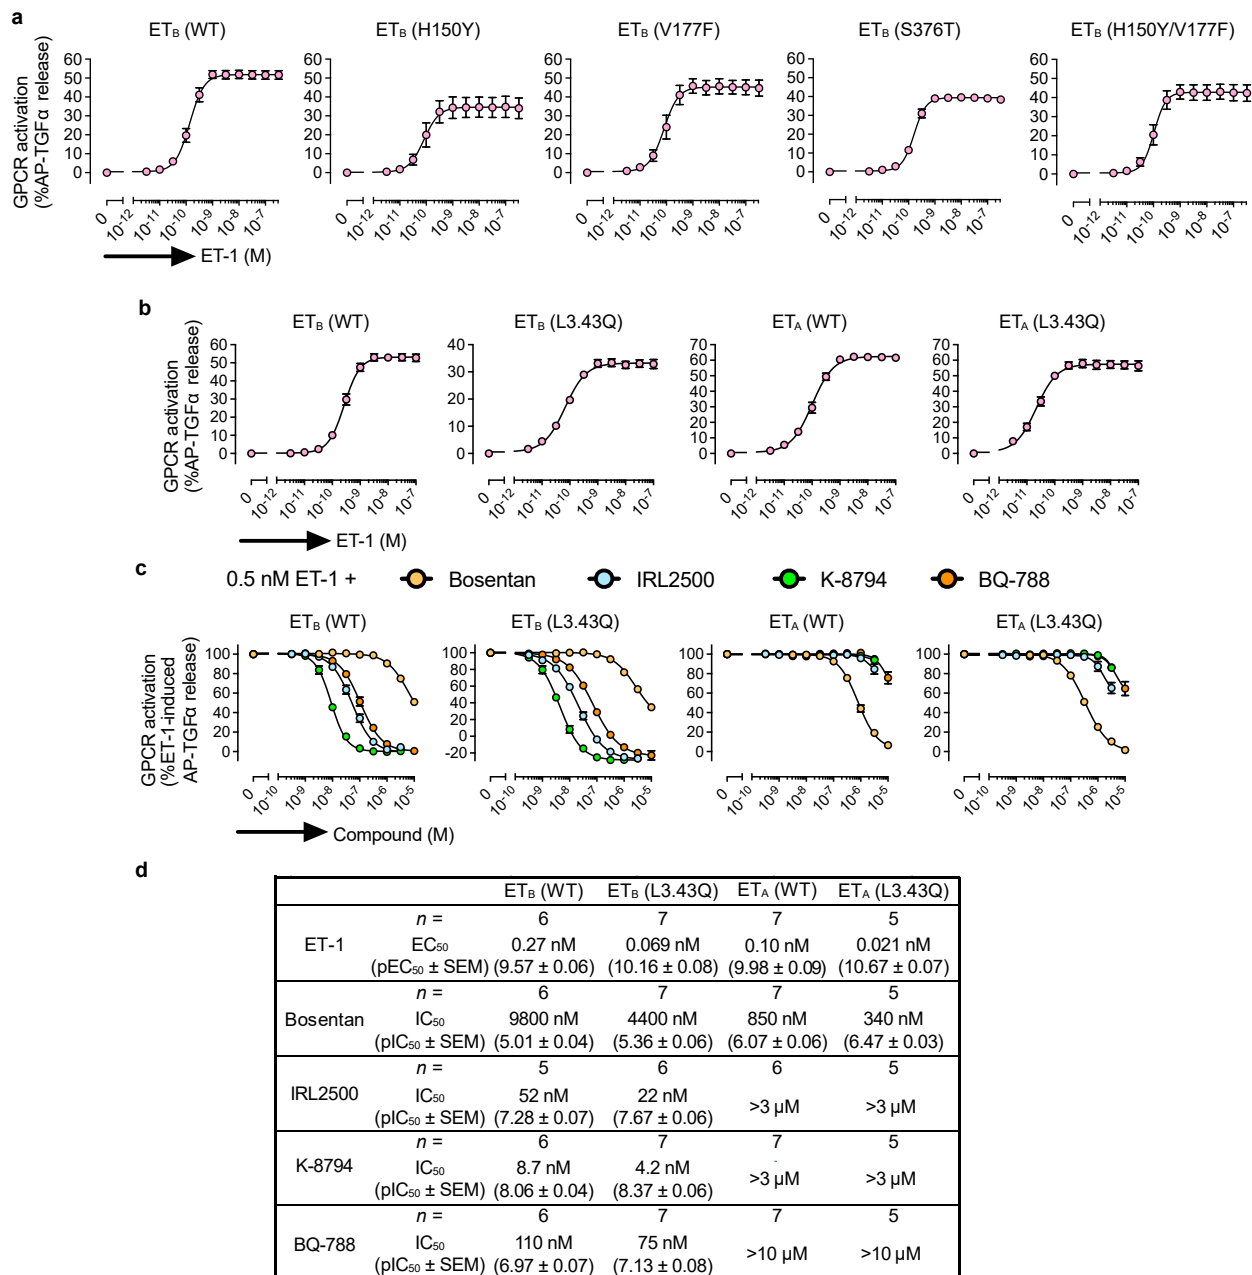

**Supplementary Figure 5 | Pharmacological characterization of mutant receptors.**

**a, b**, Concentration response-curves of AP-TGF $\alpha$  release in the ET-1 treatment of HEK293 cells expressing the mutant ET<sub>B</sub> receptors (**a**) and the constitutively active L3.43Q-mutant receptors (**b**). Symbols and error bars are means and s.e.m. (standard error of the mean) of four to seven independent experiments, each performed in duplicate or triplicate. **c**, Effect of the antagonists on ET-1 (0.5 nM)-induced responses of AP-TGF $\alpha$  release in HEK293 cells expressing the wild-type or constitutively active endothelin receptors. For each experiment, the AP-TGF $\alpha$  release response in the absence of the antagonist is set at 100%. Data are displayed as means  $\pm$  s.e.m. (standard error of the mean) from five to seven independent experiments, with each performed in duplicate or triplicate. **d**, Parameters for the agonist and the antagonists. From the concentration-response curves in (**b**) and (**c**), pEC<sub>50</sub> values (ET-1) and pIC<sub>50</sub> values (antagonists) were calculated. Mean pEC<sub>50</sub> and pIC<sub>50</sub> values were used to calculate EC<sub>50</sub> and IC<sub>50</sub> values, respectively.

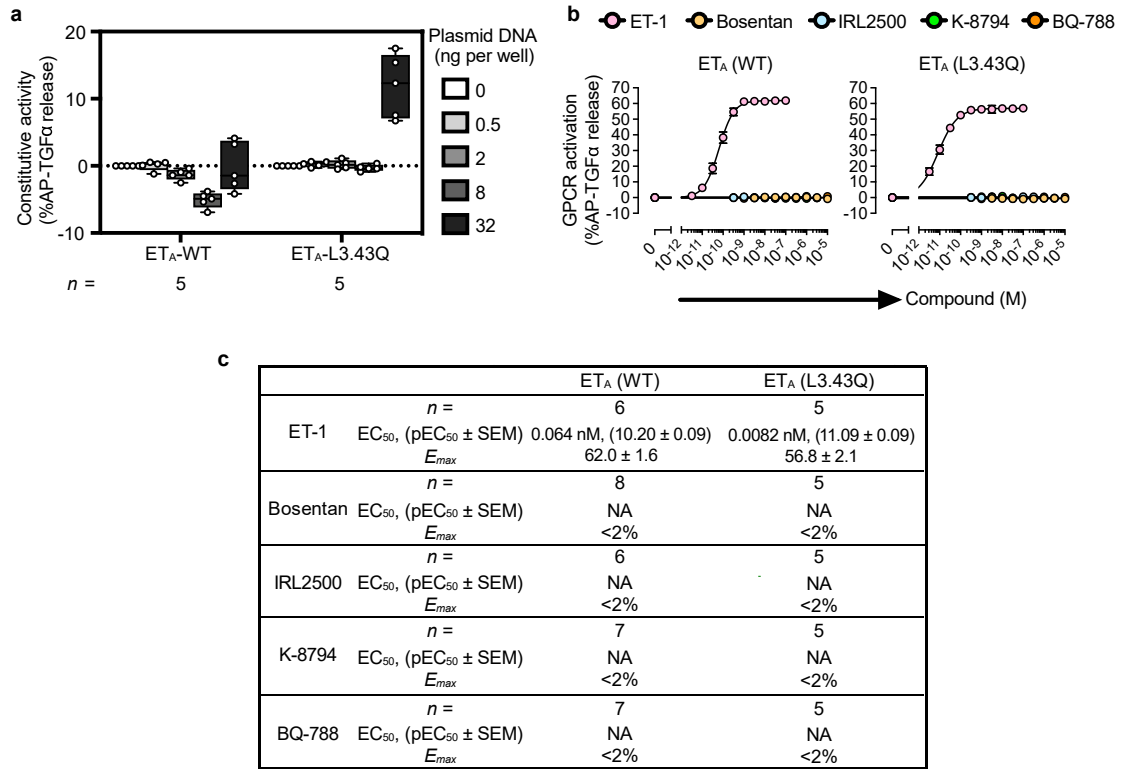

**Supplementary Figure 6 | Characterization of inverse agonist activities for the ET<sub>A</sub> receptors.**

**a**, Constitutive activity of the L3.43Q-mutant ET<sub>A</sub> receptors (ET<sub>A</sub>-L3.43Q). HEK293 cells were transfected with a titrated volume of a plasmid encoding the wildtype ET<sub>A</sub> (ET<sub>A</sub>-WT) or the ET<sub>A</sub>-L3.43Q and the accumulated AP-TGF $\alpha$  release during 24 h after transfection was measured. The AP-TGF $\alpha$  release signal in the 0 ng receptor plasmid was set as the baseline. **b**, **c**, Effects of ET-1 and the ET<sub>B</sub> antagonists (bosentan, IRL2500, K-8794 and BQ-788) on the AP-TGF $\alpha$  release for the wild-type or constitutively active ET<sub>A</sub> receptor (ET<sub>A</sub>-L3.43Q). The cells were incubated with the compounds for 4 h, instead of 1 h, the condition that was used for the other antagonist experiments. For each experiment, the AP-TGF $\alpha$  release response in the absence of the compound is set at the baseline. Data are displayed as means ± s.e.m. from five to eight independent experiments.

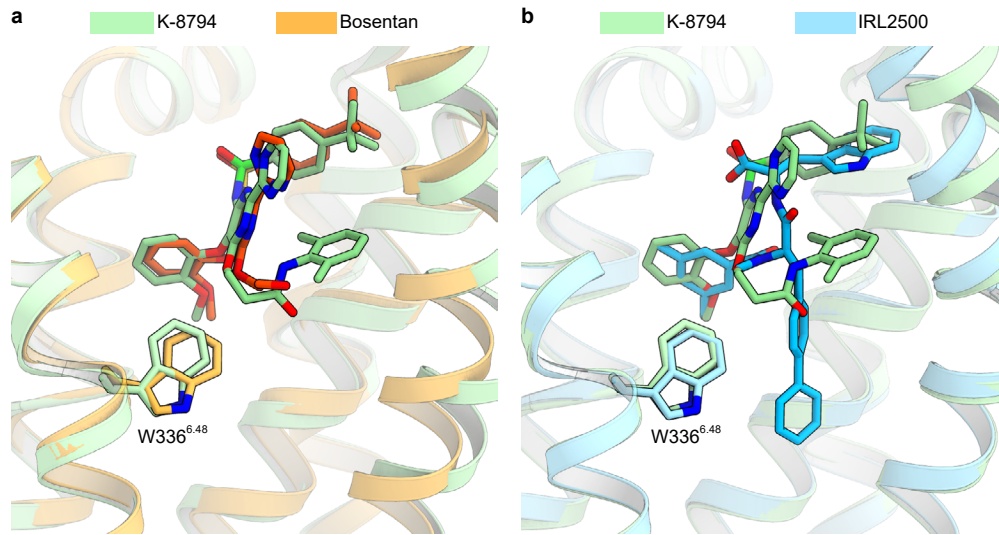

**Supplementary Figure 7 | Comparison of the K-8794, bosentan, and IRL2500-bound structures.**  
a,b, Superimpositions of the K-8794-bound receptor with the bosentan- (a) and IRL2500-bound receptors (b).
